# Supplementary material
Source: MDPI journal article supplement (https://www.mdpi.com/2073-4441/15/4/619)
Supplement: s1 [file s1]

# **Battery of In Vitro Bioassays: A Case Study for The Cost-Effective and Effect-Based Evaluation of Wastewater Effluent Quality**

**Nikiforos Alygizakis <sup>1,2,\*</sup>, Kelsey Ng <sup>2,3</sup>, Niki Maragou <sup>1</sup>, Sylvana Alirai <sup>1</sup>, Peter Behnisch <sup>4</sup>, Harrie Besselink <sup>4</sup>, Peter Oswald <sup>2</sup>, Ľuboš Čirka <sup>2,5</sup>, Nikolaos S. Thomaidis <sup>1,\*</sup> and Jaroslav Slobodnik <sup>2</sup>**

<sup>1</sup> Laboratory of Analytical Chemistry, Department of Chemistry, National and Kapodistrian University of Athens, Panepistimiopolis Zografou, 15771 Athens, Greece

<sup>2</sup> Environmental Institute, Okružná 784/42, 97241 Koš, Slovakia

<sup>3</sup> Faculty of Science, Masaryk University, RECETOX, Kamenice 753/5, Building D29, 62500 Brno, Czech Republic

<sup>4</sup> BioDetection Systems b.v., Science Park 406, 1098 XH Amsterdam, The Netherlands

<sup>5</sup> Faculty of Chemical and Food Technology, Institute of Information Engineering, Automation, and Mathematics, Slovak University of Technology (STU), Radlinského 9, 81237 Bratislava, Slovakia

\* Correspondence: alygizakis@ei.sk (N.A.); ntho@chem.uoa.gr (N.S.T.); Tel.: +421-919-183-401 (N.A.); +30-210 727-4317 (N.S.T.)

**Table S1.** Detailed information of the studied WWTPs.

| Sampling Site    | Country           | Latitude | Longitude | WW Capacity<br>(population<br>equivalent) | WW Daily<br>flow<br>(m <sup>3</sup> /day) | Treatment technologies                                                            |
|------------------|-------------------|----------|-----------|-------------------------------------------|-------------------------------------------|-----------------------------------------------------------------------------------|
| Asten AT         | Austria           | 48.23664 | 14.41243  | 950000                                    | 108259                                    | Primary sedimentation +<br>activated sludge (including<br>sequence batch reactor) |
| Vratsa BG        | Bulgaria          | 43.24422 | 23.55847  | 22310                                     | 8774                                      | Activated sludge (including<br>sequence batch reactor)                            |
| Županja HR       | Croatia           | 45.0775  | 18.6975   | 17000                                     | 2073                                      | Activated sludge (including<br>sequence batch reactor)                            |
| Hodonín CZ       | Czech<br>Republic | 48.84254 | 17.1164   | 46800                                     | 6549                                      | Activated sludge (including<br>sequence batch reactor)                            |
| Donauwörth<br>DE | Germany           | 48.71083 | 10.79611  | 100000                                    | 50000                                     | Other                                                                             |
| Győr HU          | Hungary           | 47.7303  | 17.68393  | 375000                                    | 44896                                     | Activated sludge (including<br>sequence batch reactor)                            |
| Giurgiu RO       | Romania           | 43.87214 | 25.96829  | 62894                                     | 9600                                      | Activated sludge (including<br>sequence batch reactor)                            |
| Šabac RS         | Serbia            | 44.74397 | 19.72694  | 84000                                     | 13508                                     | Activated sludge (including<br>sequence batch reactor)                            |
| Bratislava SK    | Slovakia          | 48.21542 | 17.09762  | 435300                                    | 83000                                     | Activated sludge (including<br>sequence batch reactor)                            |
| Novo Mesto SI    | Slovenia          | 45.81778 | 15.18067  | 55000                                     | 4620                                      | Activated sludge (including<br>sequence batch reactor)                            |
| Uzhgorod UA      | Ukraine           | 48.62845 | 22.28762  | 78280                                     | 47400                                     | Activated sludge (including<br>sequence batch reactor)                            |
